# Supplementary material for: Mimicking Transmural Helical Cardiomyofibre Orientation Using Bouligand-like Pore Structures in Ice-Templated Collagen Scaffolds
Source: MDPI journal article supplement (doi:10.3390/polym15224420), 2023-11-16
Supplement: s1 [file s1]

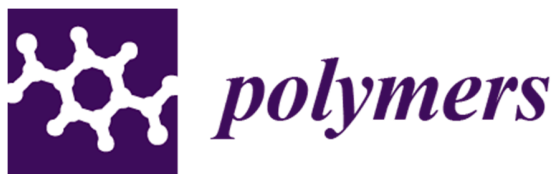

## Supplementary Materials for

### **Mimicking transmural helical cardiomyofibre orientation using Bouligand-like pore structures in ice-templated collagen scaffolds**

Huijie Zhang *et al.*

\*Corresponding author. Email: rec11@cam.ac.uk (REC); smb51@cam.ac.uk (SMB)

#### **This PDF file includes:**

Figs. S1 to S2  
Table S1  
Videos S1 to S3

#### **Other Supplementary Materials for this manuscript include the following:**

Videos S1 to S3

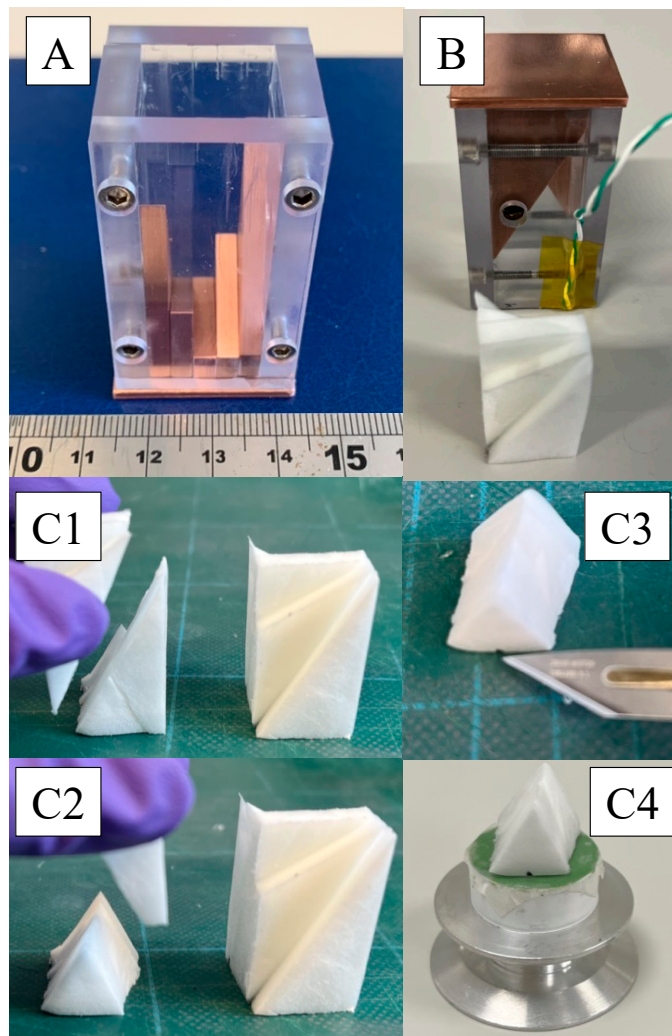

**Fig. S1. The overview of the prototype mould and sample preparation for X-ray microtomography ( $\mu$ CT).**

(A) The prototype mould. (B) The freeze-dried scaffold in dry state just taken out of the mould. (C) Detailed steps to cut the sample into the prism volume of interest for  $\mu$ CT imaging. (C1-2) Cutting of excess collagen near the base on the left hand side with the uncut sample on the right hand side. (C3) A black dot was to mark the prism positioning. (C4) The sample was mounted with double-sided tape onto the sample stage for  $\mu$ CT imaging.

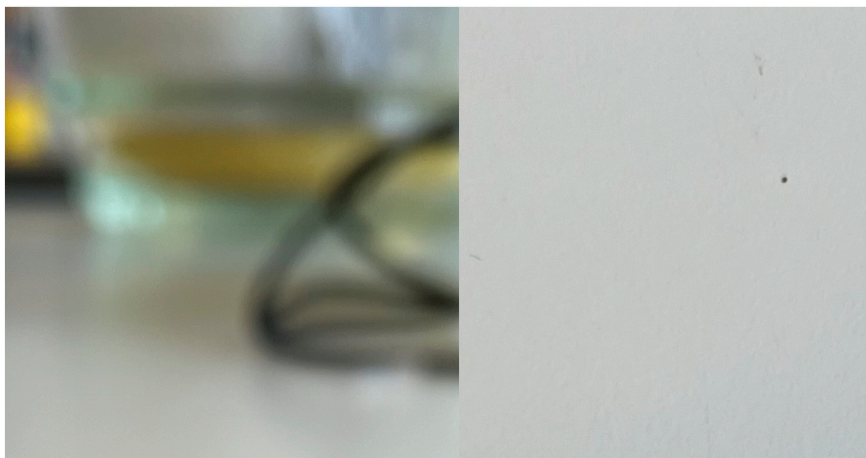

**Fig. S2. The overview of the refined mould.**

**Table S1.**

Thermal properties of the finite element simulation.

| Parameter   | Value                                          | Description                                   | Temperature-dependency |
|-------------|------------------------------------------------|-----------------------------------------------|------------------------|
| $k_w$       | $0.6 \text{ W m}^{-1} \text{ K}^{-1}$          | Thermal conductivity of water                 | No                     |
| $k_{Cu}$    | $401 \text{ W m}^{-1} \text{ K}^{-1}$          | Thermal conductivity of copper                | No                     |
| $k_p$       | $0.2 \text{ W m}^{-1} \text{ K}^{-1}$          | Thermal conductivity of polycarbonate         | No                     |
| $k_i$       | $2.2 - 0.05T \text{ W m}^{-1} \text{ K}^{-1}$  | Thermal conductivity of ice                   | Yes                    |
| $cp_w$      | $4200 \text{ J kg}^{-1} \text{ K}^{-1}$        | Specific heat capacity of water               | No                     |
| $cp_{Cu}$   | $390 \text{ J kg}^{-1} \text{ K}^{-1}$         | Specific heat capacity of copper              | No                     |
| $cp_p$      | $1200 \text{ J kg}^{-1} \text{ K}^{-1}$        | Specific heat capacity of polycarbonate       | No                     |
| $cp_i$      | $2100 + 0.6T \text{ J kg}^{-1} \text{ K}^{-1}$ | Specific heat capacity of ice                 | Yes                    |
| $\rho_w$    | $997 \text{ kg m}^{-3}$                        | Density of water                              | No                     |
| $\rho_{Cu}$ | $8960 \text{ kg m}^{-3}$                       | Density of copper                             | No                     |
| $\rho_p$    | $1200 \text{ kg m}^{-3}$                       | Density of polycarbonate                      | No                     |
| $\rho_i$    | $918 \text{ kg m}^{-3}$                        | Density of ice                                | No                     |
| $L$         | $333.5 \text{ kJ kg}^{-1}$                     | Latent heat of water-ice transition           | No                     |
| $T_f$       | $0 \text{ }^\circ\text{C}$                     | Temperature for water-ice phase change        | No                     |
| $dt$        | $4 \text{ }^\circ\text{C}$                     | Temperature interval for water-ice transition | No                     |
| $CR$        | $1 \text{ }^\circ\text{C min}^{-1}$            | Cooling rate of the cold finger               | No                     |
| $h_c$       | $27.5 \text{ W m}^{-2} \text{ K}^{-1}$         | Heat convection coefficient                   | No                     |
| $T_0$       | $20 \text{ }^\circ\text{C}$                    | Initial temperature/ambient temperature       | No                     |

**Video S1.**

3D animation of the wedge design.

**Video S2.**

3D animation of the Bouligand-like orientation design.

**Video S3.**

The reconstructed  $\mu$ CT images of the sample fabricated in the refined mould, showing a continuous pore orientation shift in region 1-5.
