# Supplementary material for: Mimicking Transmural Helical Cardiomyofibre Orientation Using Bouligand-like Pore Structures in Ice-Templated Collagen Scaffolds
Source: Polymers (Basel). 2023 Nov 16;15(22):4420. doi: 10.3390/polym15224420 (PMC10675392; doi:10.3390/polym15224420)
Supplement: Supplementary file 1 [file polymers-15-04420-s001.zip]

Archive with 4 entries (4 files):
- supplementary_materials.pdf
- VideoS1.mp4
- VideoS2.mp4
- VideoS3.mp4
